# Supplementary material
Source: PubMed Central journal article supplement (PMC2538148)
Supplement: 10162_2008_123_MOESM1_ESM.pdf [file 10162_2008_123_MOESM1_ESM.pdf]

**Supplementary Table 1. Mean age in each subsample**

| <b>Gender</b> | <b>AN</b> | <b>CA</b> | <b>CO</b> | <b>GE</b> | <b>NY</b> | <b>OU</b> | <b>PA</b> | <b>TA</b> | <b>TU</b> |
|---------------|-----------|-----------|-----------|-----------|-----------|-----------|-----------|-----------|-----------|
| Female        | 60.9      | 60.8      | 60.1      | 58.8      | 59.7      | 61.2      | 59.8      | 59.5      | 61.3      |
| Male          | 61.6      | 60.8      | 60.2      | 59.9      | 60.4      | 61.4      | 61.0      | 60.0      | 61.1      |
