# Supplementary material
Source: PubMed Central journal article supplement (PMC2538148)
Supplement: 10162_2008_123_MOESM2_ESM.pdf [file 10162_2008_123_MOESM2_ESM.pdf]

**Supplementary Table 2. Mean Z score in each subsample**

| <b>Gender</b> | <b>Z score</b> | <b>AN</b> | <b>CA</b> | <b>CO</b> | <b>GE</b> | <b>NY</b> | <b>OU</b> | <b>PA</b> | <b>TA</b> | <b>TU</b> |
|---------------|----------------|-----------|-----------|-----------|-----------|-----------|-----------|-----------|-----------|-----------|
| Female        | Zhigh          | 0.419     | 0.925     | 0.729     | 0.154     | 0.569     | 0.049     | 0.541     | 0.696     | 0.589     |
|               | Zlow           | 1.067     | 1.604     | 0.793     | 0.582     | 1.070     | 0.050     | 1.089     | 0.954     | 0.419     |
| Male          | Zhigh          | 0.161     | 0.927     | 0.595     | -0.090    | 0.328     | -0.013    | 0.485     | 0.715     | 0.363     |
|               | Zlow           | 0.958     | 1.438     | 0.681     | 0.318     | 0.865     | -0.002    | 1.091     | 1.045     | 0.385     |
