# Supplementary material
Source: PubMed Central journal article supplement (PMC2538148)
Supplement: 10162_2008_123_MOESM3_ESM.pdf [file 10162_2008_123_MOESM3_ESM.pdf]

**Supplementary Table 3. Results of all association tests**

|                            | <b>Morphometry</b>          |        |        |        |                     |        |                     |        |        |                    | <b>Question<sup>1</sup></b> |
|----------------------------|-----------------------------|--------|--------|--------|---------------------|--------|---------------------|--------|--------|--------------------|-----------------------------|
| <b>Height</b>              | AN                          | CA     | CO     | GE     | NY                  | OU     | PA                  | TA     | TU     | joint <sup>2</sup> | <b>1</b>                    |
| Zhigh                      | 0.4624                      | 0.5010 | 0.2844 | 0.8948 | 0.0455              | 0.0760 | 0.1697              | 0.4281 | 0.0089 | 0.0494             |                             |
| Zlow                       | 5.4E-5                      | 0.3905 | 0.0516 | 0.4280 | 0.0208              | 0.0327 | 0.007               | 0.0265 | 0.3581 | <b>3.5E-7</b>      |                             |
| <b>Weight</b>              | AN                          | CA     | CO     | GE     | NY                  | OU     | PA                  | TA     | TU     | joint              | <b>2</b>                    |
| Zhigh                      | 0.0821                      | 0.8315 | 0.5763 | 0.5365 | 0.9433              | 0.6018 | 0.1688              | 0.2810 | 2.2E-5 | 0.0084             |                             |
| Zlow                       | 4.8E-5                      | 0.9017 | 0.5175 | 0.4896 | 0.4642              | 0.9001 | 0.2107              | 0.3196 | 0.0003 | <b>0.0005</b>      |                             |
| <b>BMI</b>                 | AN                          | CA     | CO     | GE     | NY                  | OU     | PA                  | TA     | TU     | joint              | <b>1,2</b>                  |
| Zhigh                      | 0.0319                      | 0.8861 | 0.1931 | 0.3441 | 0.7180              | 0.0846 | 0.4839              | 0.0817 | 7.7E-7 | <b>0.0004</b>      |                             |
| Zlow                       | 6.3E-8                      | 0.8791 | 0.0675 | 0.8270 | 0.3435              | 0.1227 | 0.8590              | 0.0751 | 4.0E-5 | <b>2.7E-7</b>      |                             |
| <b>Left/right handed</b>   | AN                          | CA     | CO     | GE     | NY                  | OU     | PA                  | TA     | TU     | joint              | <b>3</b>                    |
| Zhigh                      | 0.5837                      | 0.7314 | 0.1927 | 0.3452 | 0.2089              | 0.4132 | 0.3177              | 0.5197 | 0.7465 | 0.2692             |                             |
| Zlow                       | 0.0912                      | 0.3095 | 0.9324 | 0.7992 | 0.0132 <sup>s</sup> | 0.4792 | 0.0076 <sup>s</sup> | 0.7058 | 0.8701 | 0.1304             |                             |
| <b>Sunburn sensitivity</b> | AN                          | CA     | CO     | GE     | NY                  | OU     | PA                  | TA     | TU     | joint              | <b>4</b>                    |
| Zhigh                      | 0.9064                      | 0.3769 | 0.0732 | 0.1793 | 0.0991              | 0.1611 | 0.4849              | 0.1716 | 0.0004 | 0.0077             |                             |
| Zlow                       | 0.7218                      | 0.3694 | 0.3630 | 0.2101 | 0.1853              | 0.9163 | 0.8805              | 0.6511 | 0.0052 | 0.1038             |                             |
| <b>Eye color</b>           | AN                          | CA     | CO     | GE     | NY                  | OU     | PA                  | TA     | TU     | joint              | <b>5</b>                    |
| Zhigh                      | 0.4372                      | 0.4223 | 0.4113 | 0.7420 | 0.5270              | 0.5093 | 0.5058              | 0.4827 | 0.1083 | 0.5565             |                             |
| Zlow                       | 0.3422                      | 0.6258 | 0.7240 | 0.8692 | 0.5817              | 0.1373 | 0.5430              | 0.1055 | 0.4138 | 0.6149             |                             |
|                            | <b>Medical risk factors</b> |        |        |        |                     |        |                     |        |        |                    |                             |
| <b>Allergy</b>             | AN                          | CA     | CO     | GE     | NY                  | OU     | PA                  | TA     | TU     | joint              | <b>6</b>                    |
| Zhigh                      | 0.3505                      | 0.0597 | 0.4556 | 0.9352 | 0.9082              | 0.3112 | 0.2567              | 0.1522 | 0.7111 | 0.9438             |                             |
| Zlow                       | 0.0699                      | 0.0753 | 0.4472 | 0.0606 | 0.9867              | 0.5372 | 0.4850              | 0.5058 | 0.0687 | 0.7349             |                             |

**Supplementary Table 3 (cont'd)**

|                               | <b>Medical risk factors (cont'd)</b> |        |        |        |        |        |        |    |        |                    | <b>Question<sup>1</sup></b> |
|-------------------------------|--------------------------------------|--------|--------|--------|--------|--------|--------|----|--------|--------------------|-----------------------------|
| <b>Coronary heart disease</b> | AN                                   | CA     | CO     | GE     | NY     | OU     | PA     | TA | TU     | joint <sup>2</sup> | <b>7.8</b>                  |
| Zhigh                         | -                                    | 0.0787 | -      | -      | -      | -      | -      | -  | -      | 0.0264             |                             |
| Zlow                          | -                                    | 0.6982 | -      | -      | -      | -      | -      | -  | -      | 0.9727             |                             |
| <b>Heart attack</b>           | AN                                   | CA     | CO     | GE     | NY     | OU     | PA     | TA | TU     | joint              | <b>9</b>                    |
| Zhigh                         | 0.8933                               | 0.3142 | 0.7128 | -      | -      | 0.1212 | -      | -  | -      | 0.0524             |                             |
| Zlow                          | 0.9721                               | 0.2293 | 0.0195 | -      | -      | 0.0271 | -      | -  | -      | 0.0021             |                             |
| <b>Heart catheterization</b>  | AN                                   | CA     | CO     | GE     | NY     | OU     | PA     | TA | TU     | joint              | <b>10</b>                   |
| Zhigh                         | 0.5168                               | 0.6454 | 0.2979 | 0.4639 | -      | 0.6515 | -      | -  | 0.7818 | 0.5379             |                             |
| Zlow                          | 0.4052                               | 0.5265 | 0.4437 | 0.4528 | -      | 0.4430 | -      | -  | 0.7227 | 0.4482             |                             |
| <b>Heart surgery</b>          | AN                                   | CA     | CO     | GE     | NY     | OU     | PA     | TA | TU     | joint              | <b>11</b>                   |
| Zhigh                         | 0.3848                               | -      | -      | -      | -      | -      | -      | -  | -      | 0.1952             |                             |
| Zlow                          | 0.4566                               | -      | -      | -      | -      | -      | -      | -  | -      | 0.2060             |                             |
| <b>Total CVD</b>              | AN                                   | CA     | CO     | GE     | NY     | OU     | PA     | TA | TU     | joint              | <b>7,8,12,13</b>            |
| Zhigh                         | 0.5259                               | 0.8246 | -      | -      | -      | -      | -      | -  | -      | 0.6239             |                             |
| Zlow                          | 0.6986                               | 0.4441 | -      | -      | -      | -      | -      | -  | -      | 0.0771             |                             |
| <b>CVD event</b>              | AN                                   | CA     | CO     | GE     | NY     | OU     | PA     | TA | TU     | joint              | <b>7-9,12,13</b>            |
| Zhigh                         | 0.6262                               | 0.4341 | 0.9193 | -      | 0.0857 | 0.1327 | -      | -  | -      | 0.0987             |                             |
| Zlow                          | 0.7298                               | 0.7987 | 0.0214 | -      | 0.0137 | 0.0483 | -      | -  | -      | <b>0.0003</b>      |                             |
| <b>Diabetes</b>               | AN                                   | CA     | CO     | GE     | NY     | OU     | PA     | TA | TU     | joint              | <b>14</b>                   |
| Zhigh                         | 0.9940                               | 0.1046 | 0.9439 | 0.3465 | -      | 0.4845 | 0.6365 | -  | 0.3016 | 0.0636             |                             |
| Zlow                          | 0.0313                               | 0.1105 | 0.6107 | 0.9863 | -      | 0.7687 | 0.5548 | -  | 0.1454 | 0.0010             |                             |



**Supplementary Table 3 (cont'd)**

|                                    | <b>Medicine (cont'd)</b> |        |        |        |        |        |                     |                     |        |                    | <b>Question<sup>1</sup></b> |
|------------------------------------|--------------------------|--------|--------|--------|--------|--------|---------------------|---------------------|--------|--------------------|-----------------------------|
| <b>Painkillers</b>                 | AN                       | CA     | CO     | GE     | NY     | OU     | PA                  | TA                  | TU     | joint <sup>2</sup> | <b>22</b>                   |
| Zhigh                              | 0.2691                   | 0.9776 | 0.1510 | 0.6005 | 0.2168 | 0.7575 | 0.5895              | 0.2502              | 0.1418 | 0.4230             |                             |
| Zlow                               | 0.0190                   | 0.4634 | 0.4433 | 0.7703 | 0.3986 | 0.7040 | 0.5591              | 0.0752              | 0.0249 | 0.0683             |                             |
| <b>Noise</b>                       |                          |        |        |        |        |        |                     |                     |        |                    |                             |
| <b>Gunfire noise</b>               | AN                       | CA     | CO     | GE     | NY     | OU     | PA                  | TA                  | TU     | joint              | <b>23-33</b>                |
| Zhigh_prot                         | 0.0156                   | 0.1379 | 0.7716 | 0.5042 | 0.2392 | 0.0893 | 0.1604              | 0.2456              | 0.1865 | 0.6204             |                             |
| Zhigh_unpr                         | 0.4861                   | 0.3421 | 0.1859 | 0.0032 | 0.0752 | 0.5307 | 0.6909              | 0.2780              | 0.6289 | 0.0094             |                             |
| Zlow_prot                          | 0.1472                   | 0.2203 | 0.7597 | 0.3713 | 0.4566 | 0.7133 | 0.3632              | 0.7517              | 0.7781 | 0.5638             |                             |
| Zlow_unpr                          | 0.0817                   | 0.1305 | 0.1127 | 0.0596 | 0.6350 | 0.8768 | 0.0512 <sup>s</sup> | 0.0167 <sup>s</sup> | 0.5700 | 0.7253             |                             |
| <b>Occupational noise exposure</b> | AN                       | CA     | CO     | GE     | NY     | OU     | PA                  | TA                  | TU     | joint              | <b>34</b>                   |
| Zhigh                              | 0.1421                   | 0.0120 | 0.0005 | 0.0157 | 3E-5   | 0.0002 | 0.0105              | 0.0023              | 0.0014 | <b>1.0E-17</b>     |                             |
| Zlow                               | 0.3961                   | 0.0072 | 0.0117 | 0.7178 | 0.0130 | 0.1249 | 0.1888              | 0.0190              | 0.0415 | <b>1.0E-9</b>      |                             |
| <b>Years noise exposure</b>        | AN                       | CA     | CO     | GE     | NY     | OU     | PA                  | TA                  | TU     | joint              | <b>35</b>                   |
| Zhigh                              | 0.0933                   | 0.0228 | 0.0068 | 0.1280 | 0.0003 | 0.0005 | 0.0024              | 0.0018              | 0.0054 | <b>1.0E-17</b>     |                             |
| Zlow                               | 0.5693                   | 0.0701 | 0.1416 | 0.4109 | 0.0573 | 0.1665 | 0.1536              | 0.0256              | 0.0640 | <b>1.1E-7</b>      |                             |
| <b>Total noise exposure</b>        | AN                       | CA     | CO     | GE     | NY     | OU     | PA                  | TA                  | TU     | joint              | <b>35-36</b>                |
| Zhigh                              | 0.0280                   | 0.0542 | 0.0014 | 0.1512 | 4.8E-5 | 0.0003 | 0.0016              | 0.0054              | 0.0019 | <b>1.0E-17</b>     |                             |
| Zlow                               | 0.9354                   | 0.1264 | 0.0914 | 0.4656 | 0.0362 | 0.1648 | 0.0745              | 0.0704              | 0.0349 | <b>1.8E-7</b>      |                             |
| <b>Ear protection</b>              | AN                       | CA     | CO     | GE     | NY     | OU     | PA                  | TA                  | TU     | joint              | <b>38</b>                   |
| Zhigh                              | 0.3151                   | 0.6796 | -      | -      | -      | 0.0205 | -                   | -                   | -      | 0.0407             |                             |
| Zlow                               | 0.3585                   | 0.9326 | -      | -      | -      | 0.6145 | -                   | -                   | -      | 0.061              |                             |

**Supplementary Table 3 (cont'd)**

|                                    | <b>Solvents</b> |        |        |        |        |        |        |        |        |                    | <b>Question<sup>1</sup></b> |
|------------------------------------|-----------------|--------|--------|--------|--------|--------|--------|--------|--------|--------------------|-----------------------------|
| <b>Solvent exposure</b>            | AN              | CA     | CO     | GE     | NY     | OU     | PA     | TA     | TU     | joint <sup>2</sup> | <b>39-40</b>                |
| Zhigh                              | 0.5749          | 0.3121 | 0.3154 | 0.3108 | 0.9981 | 0.0697 | 0.4673 | 0.1491 | 0.0763 | 0.0013             |                             |
| Zlow                               | 0.0684          | 0.7310 | 0.5863 | 0.5646 | 0.7021 | 0.1129 | 0.7813 | 0.8647 | 0.8140 | 0.7663             |                             |
| <b>Total solvent exposure</b>      | AN              | CA     | CO     | GE     | NY     | OU     | PA     | TA     | TU     | joint              | <b>39-42</b>                |
| Zhigh                              | 0.2632          | 0.4164 | 0.7814 | 0.7209 | 0.4063 | 0.1683 | 0.9496 | 0.1869 | 0.2773 | 0.0947             |                             |
| Zlow                               | 0.2780          | 0.5177 | 0.7591 | 0.9524 | 0.5827 | 0.0346 | 0.3910 | 0.6191 | 0.5183 | 0.8752             |                             |
| <b>Solvent*Noise interaction</b>   | AN              | CA     | CO     | GE     | NY     | OU     | PA     | TA     | TU     | joint              | <b>34,39</b>                |
| Zhigh                              | 0.4742          | 0.4507 | 0.3812 | 0.3147 | 0.9344 | 0.3586 | 0.8783 | 0.6512 | 0.0560 | 0.4037             |                             |
| Zlow                               | 0.0997          | 0.9991 | 0.1361 | 0.5520 | 0.8267 | 0.2931 | 0.3711 | 0.6074 | 0.1732 | 0.2947             |                             |
|                                    | <b>Smoking</b>  |        |        |        |        |        |        |        |        |                    |                             |
| <b>Current or former smoking</b>   | AN              | CA     | CO     | GE     | NY     | OU     | PA     | TA     | TU     | joint              | <b>43</b>                   |
| Zhigh                              | 0.3259          | 0.0139 | 0.9225 | 0.0123 | 0.1434 | 0.0366 | 0.3641 | 0.7588 | 0.9730 | 0.0009             |                             |
| Zlow                               | 0.0249          | 0.0628 | 0.7194 | 0.7151 | 0.3982 | 0.6181 | 0.2493 | 0.2952 | 0.4497 | 0.0808             |                             |
| <b>Smoking history (packyears)</b> | AN              | CA     | CO     | GE     | NY     | OU     | PA     | TA     | TU     | joint              | <b>43-46</b>                |
| Zhigh                              | 0.0536          | 0.0015 | 0.0193 | 0.0062 | 0.0200 | 0.0002 | 0.9880 | 0.7983 | 0.2672 | <b>1.0E-9</b>      |                             |
| Zlow                               | 0.0954          | 0.0311 | 0.1144 | 0.3300 | 0.1732 | 0.2986 | 0.4111 | 0.8060 | 0.8990 | <b>0.0004</b>      |                             |
| <b>Smoking_by sex (high)</b>       | AN              | CA     | CO     | GE     | NY     | OU     | PA     | TA     | TU     | joint              | <b>43-46</b>                |
| male                               | 0.1010          | 0.0263 | 0.0155 | 0.0829 | 0.0361 | 0.0004 | 0.7013 | 0.6971 | 0.1900 | <b>1.9E-7</b>      |                             |
| fem                                | 0.3247          | 0.0177 | 0.2218 | 0.0189 | 0.2765 | 0.2174 | 0.1619 | 0.9297 | 0.9496 | <b>0.0006</b>      |                             |
| <b>Smoking_by sex (low)</b>        | AN              | CA     | CO     | GE     | NY     | OU     | PA     | TA     | TU     | joint              | <b>43-46</b>                |
| male                               | 0.5641          | 0.077  | 0.2229 | 0.3604 | 0.033  | 0.1116 | 0.5577 | 0.6261 | 0.6407 | 0.0017             |                             |
| fem                                | 0.048           | 0.1263 | 0.1631 | 0.7079 | 0.7339 | 0.9708 | 0.1035 | 0.2943 | 0.4493 | 0.0698             |                             |

**Supplementary table 3 (cont'd)**

|                                         | <b>Smoking (cont'd)</b>    |        |        |        |        |        |        |        |        |                    | <b>Question<sup>1</sup></b> |
|-----------------------------------------|----------------------------|--------|--------|--------|--------|--------|--------|--------|--------|--------------------|-----------------------------|
| <b>Smoking dosage effect in smokers</b> | AN                         | CA     | CO     | GE     | NY     | OU     | PA     | TA     | TU     | joint <sup>2</sup> | <b>43-46</b>                |
| Zhigh                                   | 0.0913                     | 0.0449 | 0.0017 | 0.1099 | 0.1437 | 0.0066 | 0.1714 | 0.4001 | 0.2441 | <b>3.0E-7</b>      |                             |
| Zlow                                    | 0.9702                     | 0.2185 | 0.0807 | 0.0842 | 0.4103 | 0.2385 | 0.8312 | 0.4683 | 0.5390 | 0.005              |                             |
| <b>Smoking*noise interaction</b>        | AN                         | CA     | CO     | GE     | NY     | OU     | PA     | TA     | TU     | joint              | <b>34,43</b>                |
| Zhigh                                   | 0.5376                     | 0.8083 | 0.2135 | 0.9108 | 0.2926 | 0.8756 | 0.1610 | 0.7295 | 0.9769 | 0.5666             |                             |
| Zlow                                    | 0.2140                     | 0.4545 | 0.3204 | 0.4415 | 0.7781 | 0.9497 | 0.0397 | 0.2539 | 0.4740 | 0.6461             |                             |
|                                         | <b>Alcohol consumption</b> |        |        |        |        |        |        |        |        |                    |                             |
| <b>Regular alcohol consumption</b>      | AN                         | CA     | CO     | GE     | NY     | OU     | PA     | TA     | TU     | joint              | <b>47</b>                   |
| Zhigh                                   | 0.0559                     | 0.7661 | 0.0128 | 0.1611 | 0.0024 | 0.0500 | 0.2572 | 0.7264 | 0.0999 | <b>8.4E-6</b>      |                             |
| Zlow                                    | 0.1314                     | 0.2191 | 0.1085 | 0.0161 | 0.002  | 0.4782 | 0.2806 | 0.7907 | 0.0059 | <b>5.2E-6</b>      |                             |
| <b>Amount of alcohol</b>                | AN                         | CA     | CO     | GE     | NY     | OU     | PA     | TA     | TU     | joint              | <b>48</b>                   |
| Zhigh                                   | 0.1876                     | 0.2310 | 0.8474 | 0.0949 | 0.0152 | 0.0988 | 0.3470 | 0.8367 | 0.1832 | 0.0016             |                             |
| Zlow                                    | 0.1075                     | 0.0458 | 0.8887 | 0.011  | 0.0597 | 0.6347 | 0.7217 | 0.5830 | 0.0347 | 0.0025             |                             |

| Multivariable analysis <sup>3</sup>       |        |        |        |        |        |        |                     |                     |        |                    | Question <sup>1</sup> |
|-------------------------------------------|--------|--------|--------|--------|--------|--------|---------------------|---------------------|--------|--------------------|-----------------------|
| <b>Smoking (packyears), BMI, CVDevent</b> | AN     | CA     | CO     | GE     | NY     | OU     | PA                  | TA                  | TU     | Joint <sup>2</sup> | <b>1,2</b>            |
| Zhigh CVDevent                            | 0.8014 | 0.4922 | 0.6533 | 0.2945 | 0.2824 | 0.1706 | 0.5876              | 0.2914              | 0.0401 | 0.0929             | <b>43-46</b>          |
| Packyears                                 | 0.0334 | 0.0029 | 0.0145 | 0.0131 | 0.0589 | 0.0006 | 0.9964              | 0.9632              | 0.4950 | <b>2.4E-8</b>      | <b>7-9,12,13</b>      |
| BMI                                       | 0.1012 | 0.2865 | 0.2882 | 0.2399 | 0.8523 | 0.1085 | 0.5381              | 0.0834              | 1.2e-6 | <b>0.0004</b>      |                       |
| Zlow CVDevent                             | 0.5509 | 0.7203 | 0.0392 | 0.8200 | 0.1328 | 0.0515 | 0.3503              | 0.3431              | 0.0011 | 0.0015             |                       |
| Packyears                                 | 0.1312 | 0.0745 | 0.2010 | 0.3131 | 0.6050 | 0.4881 | 0.5368              | 0.6882              | 0.4166 | 0.0084             |                       |
| BMI                                       | 8.5e-7 | 0.4874 | 0.2138 | 0.8803 | 0.5731 | 0.0920 | 0.8083              | 0.1021              | 0.0001 | <b>4.8E-7</b>      |                       |
| <b>Occupational and gunfire noise</b>     | AN     | CA     | CO     | GE     | NY     | OU     | PA                  | TA                  | TU     | joint              | <b>23-33</b>          |
| Zhigh Occupational noise exposure         | 0.4683 | 0.0048 | 0.0002 | 0.0317 | 0.0002 | 0.0004 | 0.0038              | 0.0009              | 0.0046 | <b>1.0E-17</b>     | <b>34</b>             |
| Gunfire protected                         | 0.0177 | 0.1374 | 0.4943 | 0.5449 | 0.5246 | 0.1276 | 0.0986              | 0.3995              | 0.1030 | 0.6267             |                       |
| Gunfire unprotected                       | 0.5980 | 0.2025 | 0.1797 | 0.0043 | 0.1942 | 0.4295 | 0.5701              | 0.3182              | 0.4917 | 0.0354             |                       |
| Zlow Occupational noise exposure          | 0.0663 | 0.0005 | 0.0892 | 0.7187 | 0.0167 | 0.0595 | 0.0230              | 0.0454              | 0.0019 | <b>1.4E-7</b>      |                       |
| Gunfire protected                         | 0.1238 | 0.2265 | 0.8041 | 0.4461 | 0.5874 | 0.8429 | 0.2876              | 0.9888              | 0.8229 | 0.5736             |                       |
| Gunfire unprotected                       | 0.1178 | 0.0647 | 0.1243 | 0.0507 | 0.7289 | 0.9779 | 0.0168 <sup>§</sup> | 0.0163 <sup>§</sup> | 0.4884 | 0.8844             |                       |

<sup>1</sup> Exact questions are provided in Supplementary table 4.

<sup>2</sup> P-values in bold remain significant after Bonferroni correction for 74 tests (p<0.00067).

<sup>3</sup> Significance of the regression coefficient in multivariable model, type 3 sum-of-squares.

<sup>§</sup> Associations go in opposite directions.
