# Supplementary material
Source: PubMed Central journal article supplement (PMC2538148)
Supplement: 10162_2008_123_MOESM4_ESM.pdf [file 10162_2008_123_MOESM4_ESM.pdf]

**Supplementary Table 4. Questions and answers used in Supplementary table 3**

| <b>Item</b>                   | <b>nr</b> | <b>question</b>                                            | <b>answer</b>                                                                       |
|-------------------------------|-----------|------------------------------------------------------------|-------------------------------------------------------------------------------------|
| <b>Morphometry</b>            |           |                                                            |                                                                                     |
| <b>Height</b>                 | 1         | What is your height? (in cm)                               | number                                                                              |
| <b>Weight</b>                 | 2         | What is your weight? (in kg)                               | number                                                                              |
| <b>BMI</b>                    | 1,2       | see above                                                  | Calculated BMI = weight(in kilo)/length <sup>2</sup> (in meter)                     |
| <b>Left/right handed</b>      | 3         | Are you left or right handed?                              | left/right                                                                          |
| <b>Sunburn sensitivity</b>    | 4         | Are you susceptible to sunburn?                            | Very much / Much / Not very much / Not at all                                       |
| <b>Eye color</b>              | 5         | What is the colour of your eyes?                           | Very light blue or very light grey / Blue / Grey / Green / Light brown / Dark brown |
| <b>Medical risk factors</b>   |           |                                                            |                                                                                     |
| <b>Allergy</b>                | 6         | Do you suffer from allergy?                                | yes/no                                                                              |
| <b>Coronary heart disease</b> | 7         | Do you have other problems with your heart or circulation? | yes/no                                                                              |
|                               | 8         | Please write down which problems.                          | memo                                                                                |
| <b>Heart attack</b>           | 9         | Have you ever had a heart attack?                          | yes/no                                                                              |
| <b>Heart catheterization</b>  | 10        | Have you ever had coronary artery catheterization?         | yes/no                                                                              |
| <b>Heart surgery</b>          | 11        | Have you ever had heart surgery?                           | yes/no                                                                              |

**Supplementary Table 4 (cont'd)**

| <b>Medical risk factors (cont'd)</b> |           |                                                                                                                                                                                           |                                                                                                                                              |
|--------------------------------------|-----------|-------------------------------------------------------------------------------------------------------------------------------------------------------------------------------------------|----------------------------------------------------------------------------------------------------------------------------------------------|
| <b>Total CVD</b>                     | 7,8       | see above                                                                                                                                                                                 |                                                                                                                                              |
|                                      | 12        | Have you ever had a stroke?                                                                                                                                                               | yes/no                                                                                                                                       |
|                                      | 13        | Do you suffer from intermittent claudication? (this is if you can't walk more than 200m, because you get cramps in your legs, and when you stand still for a moment the pain gets better) | yes/no                                                                                                                                       |
|                                      |           |                                                                                                                                                                                           | Calculated presence of any Cardiovascular Disease (either coronary heart disease, stroke or intermittent claudication)                       |
| <b>CVD event</b>                     | 7-9,12,13 | see above                                                                                                                                                                                 | Calculated occurrence of any Cardiovascular Disease Event (either coronary heart disease, heart attack, stroke or intermittent claudication) |
| <b>Diabetes</b>                      | 14        | Do you suffer from diabetes?                                                                                                                                                              | yes/no/don't know                                                                                                                            |
| <b>Insulin</b>                       | 15        | Do you need insulin?                                                                                                                                                                      | yes/no                                                                                                                                       |
| <b>Lung problems</b>                 | 16        | Do you suffer from lung problems?                                                                                                                                                         | yes/no                                                                                                                                       |
| <b>Osteoarthritis</b>                | 17        | Do you suffer from osteoarthritis?                                                                                                                                                        | yes/no                                                                                                                                       |
| <b>Osteoporosis</b>                  | 18        | Do you suffer from osteoporosis?                                                                                                                                                          | yes/no                                                                                                                                       |
| <b>Whiplash</b>                      | 19        | Have you ever had a whiplash injury?                                                                                                                                                      | yes/no/don't know                                                                                                                            |

**Supplementary Table 4 (cont'd)**

| <b>Medicine</b>                    |    |                                                                                                                                                             |                                                                                                                                     |
|------------------------------------|----|-------------------------------------------------------------------------------------------------------------------------------------------------------------|-------------------------------------------------------------------------------------------------------------------------------------|
| <b>Aspirin</b>                     | 20 | Do you take aspirin on a daily basis for your heart or to dilute your blood?                                                                                | yes/no                                                                                                                              |
| <b>Atorvastatin</b>                | 21 | Please list all of the medication you have taken on a regular basis (for more than three months) in the past or that you are taking now on a regular basis. | memo                                                                                                                                |
| <b>Painkillers</b>                 | 22 | On average how often do you take painkillers?                                                                                                               | Never / Less than 1 tablet a month / Less than 1 tablet a week (but more than one a month) / 2-5 tablets a week / 2-5 tablets a day |
| <b>Noise</b>                       |    |                                                                                                                                                             |                                                                                                                                     |
| <b>Gunfire noise</b>               | 23 | Have you ever fired a gun?                                                                                                                                  | yes/no                                                                                                                              |
|                                    | 24 | Have you fired rifles or shotguns (SLR, .303")?                                                                                                             | yes/no                                                                                                                              |
|                                    | 25 | Have you fired machine guns (Bren, Vickers, Lewis, Browning, GMPG)?                                                                                         | yes/no                                                                                                                              |
|                                    | 26 | Have you fired other light weapons?                                                                                                                         | yes/no                                                                                                                              |
|                                    | 27 | Try to estimate the total number of shots fired with light weapons                                                                                          | Less than 10 shots / 10-100 shots / 101-1000 shots / 1001-10.000 shots / More than 10.000 shots                                     |
|                                    | 28 | Did you use ear protection when firing with light weapons?                                                                                                  | yes/no                                                                                                                              |
|                                    | 29 | Have you fired or been close to light artillery (20mm, 40mm, 2lb, 3lb)?                                                                                     | yes/no                                                                                                                              |
|                                    | 30 | Have you fired or been close to larger artillery (anti-tank guns, heavy anti-aircraft, 57mm, 3"...)?                                                        | yes/no                                                                                                                              |
|                                    | 31 | Have you fired or been close to other heavy weapons?                                                                                                        | yes/no                                                                                                                              |
|                                    | 32 | Try to estimate the total number of shots fired with heavy weapons                                                                                          | Less than 10 shots / 10-100 shots / 101-1000 shots / 1001-10.000 shots / More than 10.000 shots                                     |
|                                    | 33 | Did you use noise protection when firing with heavy weapons?                                                                                                | yes/no                                                                                                                              |
| <b>Occupational noise exposure</b> | 34 | Have you ever worked for more than 1 year in a place where you had to raise your voice to make yourself heard by someone standing 1 m away from you?        | yes/no                                                                                                                              |

**Supplementary Table 4 (cont'd)**

| <b>Noise (cont'd)</b>            |       |                                                                                                                                                     |                                                                                                                                                                                                                              |
|----------------------------------|-------|-----------------------------------------------------------------------------------------------------------------------------------------------------|------------------------------------------------------------------------------------------------------------------------------------------------------------------------------------------------------------------------------|
| <b>Years noise exposure</b>      | 35    | How many years have you been doing this job?                                                                                                        | number<br>set to zero if Question 34 = no                                                                                                                                                                                    |
| <b>Total noise exposure</b>      | 35    | see above                                                                                                                                           | number                                                                                                                                                                                                                       |
|                                  | 36    | How many hours per day were you exposed to noise?                                                                                                   | number                                                                                                                                                                                                                       |
| <b>Ear protection</b>            | 38    | Did you use ear protection?                                                                                                                         | Always / Most of the time / More than 50% of the time / Less than 50% of the time / Never<br>note: scale of 5 dichotomized into 2 groups: 'always' or 'most of the time' versus rest<br>only calculated if question 34 = yes |
| <b>Solvents</b>                  |       |                                                                                                                                                     |                                                                                                                                                                                                                              |
| <b>Solvent exposure</b>          | 39    | Have you been exposed to solvents (e.g. trichloroethylene, toluene, evaporations from paints or lacquers) for more than 1 year in one of your jobs? | yes/no                                                                                                                                                                                                                       |
|                                  | 40    | Which solvents?                                                                                                                                     | memo                                                                                                                                                                                                                         |
| <b>Total solvent exposure</b>    | 41    | For how many years were you exposed to solvents?                                                                                                    | number                                                                                                                                                                                                                       |
|                                  | 42    | For how many hours per day were you exposed to solvents?                                                                                            | number<br><br>calculated # years work in solvents * # hours/day ;<br>set to zero if question 39 = no                                                                                                                         |
| <b>Solvent*noise interaction</b> | 34,39 | see above                                                                                                                                           | Interaction between solvents and noise                                                                                                                                                                                       |

**Supplementary Table 4 (cont'd)**

| <b>Smoking</b>                          |                         |                                                                                                                                                            |                                                                                                                                                              |
|-----------------------------------------|-------------------------|------------------------------------------------------------------------------------------------------------------------------------------------------------|--------------------------------------------------------------------------------------------------------------------------------------------------------------|
| <b>Current or former smoking</b>        | 43                      | Have you ever smoked regularly?                                                                                                                            | yes/no                                                                                                                                                       |
| <b>Smoking history (packyears)</b>      | 44                      | At what age did you start smoking?                                                                                                                         | date                                                                                                                                                         |
|                                         | 45                      | How many years did you (have you) smoke(d) up to now?                                                                                                      | number                                                                                                                                                       |
|                                         | 46                      | Approximately how many cigarettes do (did) you smoke on average each day?                                                                                  | Less than 5 each day / 5-10 each day / 10-20 each day / More than 20 each day<br>calculated #packs/day * #years smoked ;<br>set to zero if question 417 = no |
| <b>Smoking by sex</b>                   | 43-46                   | see above                                                                                                                                                  | association with packyears, calculated separately for males and females                                                                                      |
| <b>Smoking adjusted for CVD</b>         | 7-9,<br>12,13,<br>43-46 | see above                                                                                                                                                  | association with packyears, correcting for occurrence of cardiovascular disease event                                                                        |
| <b>Smoking dosage effect in smokers</b> | 43-46                   | see above                                                                                                                                                  | association with packyears, calculated in in smokers only                                                                                                    |
| <b>Smoking*noise interaction</b>        | 34,43                   | see above                                                                                                                                                  | interaction between smoking and noise exposure                                                                                                               |
| <b>Alcohol consumption</b>              |                         |                                                                                                                                                            |                                                                                                                                                              |
| <b>Regular alcohol use</b>              | 47                      | Do you drink alcohol regularly? (every week)                                                                                                               | yes/no                                                                                                                                                       |
| <b>Amount of alcohol</b>                | 48                      | How many drinks do you have on average? (a small bottle of beer (25cl), a glass of red or white wine (12cl) or a glass of spirits (4cl) counts as 1 drink) | Less than 1 drink each week / 1-5 drinks each week / 1-3 drinks each day / More than 3 drinks each day<br><br>set to zero if question 47 = no                |
