# Supplementary material
Source: PubMed Central journal article supplement (PMC2538148)
Supplement: 10162_2008_123_MOESM5_ESM.pdf [file 10162_2008_123_MOESM5_ESM.pdf]

**Supplementary Table 5. Association tests used in cluster analysis (Suppl. Figure 1) and image plots (Suppl. Figure 2)**

| <b>Association test (Suppl. Table 3)</b> | <b>Nr</b> |
|------------------------------------------|-----------|
| Height                                   | 1         |
| Weight                                   | 2         |
| BMI                                      | 3         |
| Left/right handed                        | 4         |
| Sunburn sensitivity                      | 5         |
| Eye color                                | 6         |
| Allergy                                  | 7         |
| Coronary heart disease                   | 8         |
| Heart attack                             | 9         |
| Heart catheterization                    | 10        |
| Heart surgery                            | 11        |
| Total CVD                                | 12        |
| CVD event                                | 13        |
| Diabetes                                 | 14        |
| Lung problems                            | 15        |
| Osteoarthritis                           | 16        |
| Osteoporosis                             | 17        |
| Whiplash                                 | 18        |
| Aspirin                                  | 19        |
| Painkillers                              | 20        |
| Gunfire noise protected                  | 21        |
| Gunfire noise unprotected                | 22        |
| Occupational noise exposure              | 23        |
| Years noise exposure                     | 24        |
| Total noise exposure                     | 25        |
| Ear protection                           | 26        |
| Solvent exposure                         | 27        |
| Total solvent exposure                   | 28        |
| Solvent - noise interaction              | 29        |
| Current or former smoking                | 30        |
| Smoking history (packyears)              | 31        |
| Smoking by sex (male)                    | 32        |
| Smoking by sex (female)                  | 33        |
| Smoking dosage effect in smokers         | 34        |
| Smoking - noise interaction              | 35        |
| Regular alcohol consumption              | 36        |
| Amount of alcohol                        | 37        |
| CVDevent (MultiVariate)                  | 38        |
| Packyears (MultiVariate)                 | 39        |
| BMI (MultiVariate)                       | 40        |
| Occupational noise (MultiVariate)        | 41        |
| Gunfire protected (MultiVariate)         | 42        |
| Gunfire unprotected (MultiVariate)       | 43        |
