# Supplementary material
Source: PubMed Central journal article supplement (PMC2538148)
Supplement: 10162_2008_123_MOESM8_ESM.pdf [file 10162_2008_123_MOESM8_ESM.pdf]

**p values Zhigh**

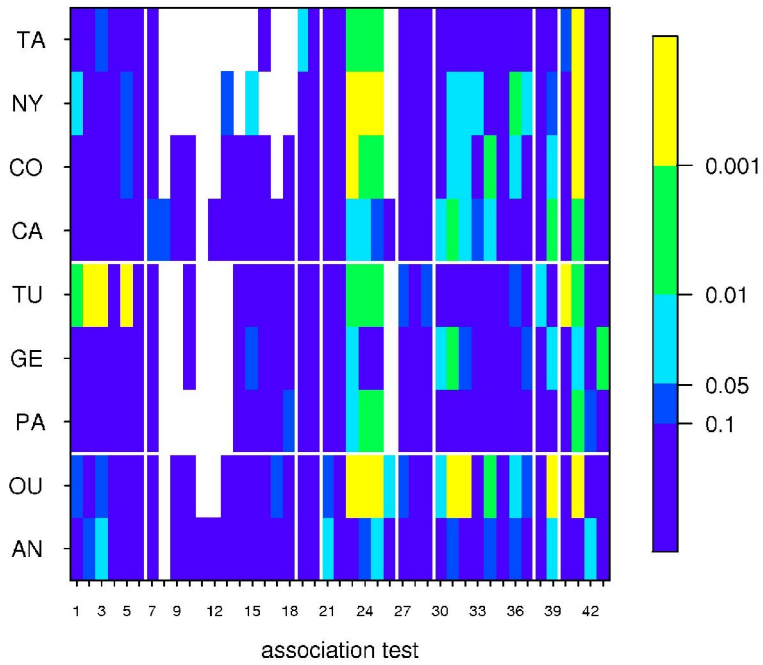

**p values Zlow**

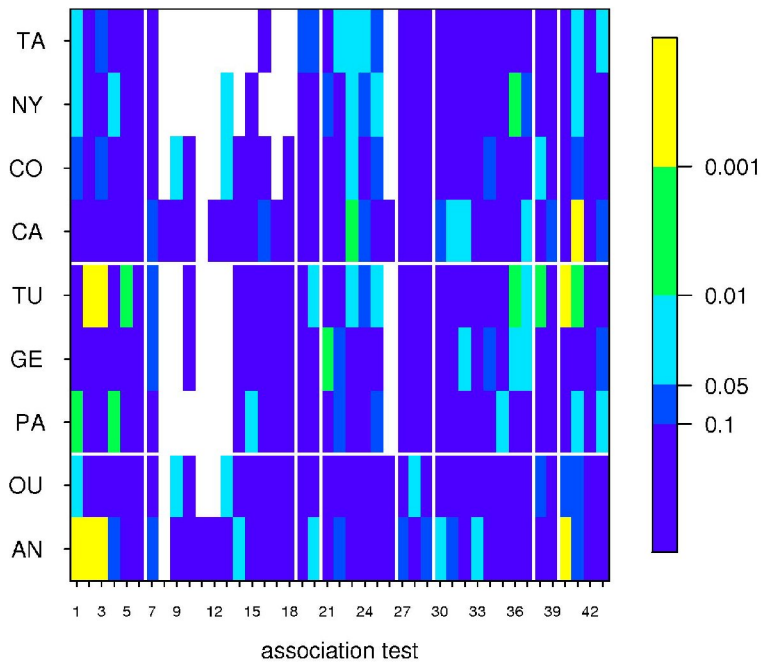

**Supplementary Figure 3**

**Supplementary Figure 3. Image plot of the p values for association with Zhigh and Zlow.**

This plot represents the significance of the association tests in the 9 subsamples. The numbers on the X-axis point to the association tests listed in Supplementary Table 5. The white vertical lines subdivide the association tests according to the subdivisions made in Supplementary Table 3. On the Y-axis, the 9 subsamples are given. The white horizontal lines separate the three recruitment strategies: population-based (OU and AN), mixed (PA, GE, TU) and clinical (CA, CO, NY, TA). The color of each field denotes the significance level of the test, according to the legend given on the right of the figure. There is no apparent relation between significance level and recruitment strategy. Otherwise said, there are no association tests for which significance is restricted to one particular recruitment strategy.
