# Supplementary material
Source: PubMed Central journal article supplement (PMC2538148)

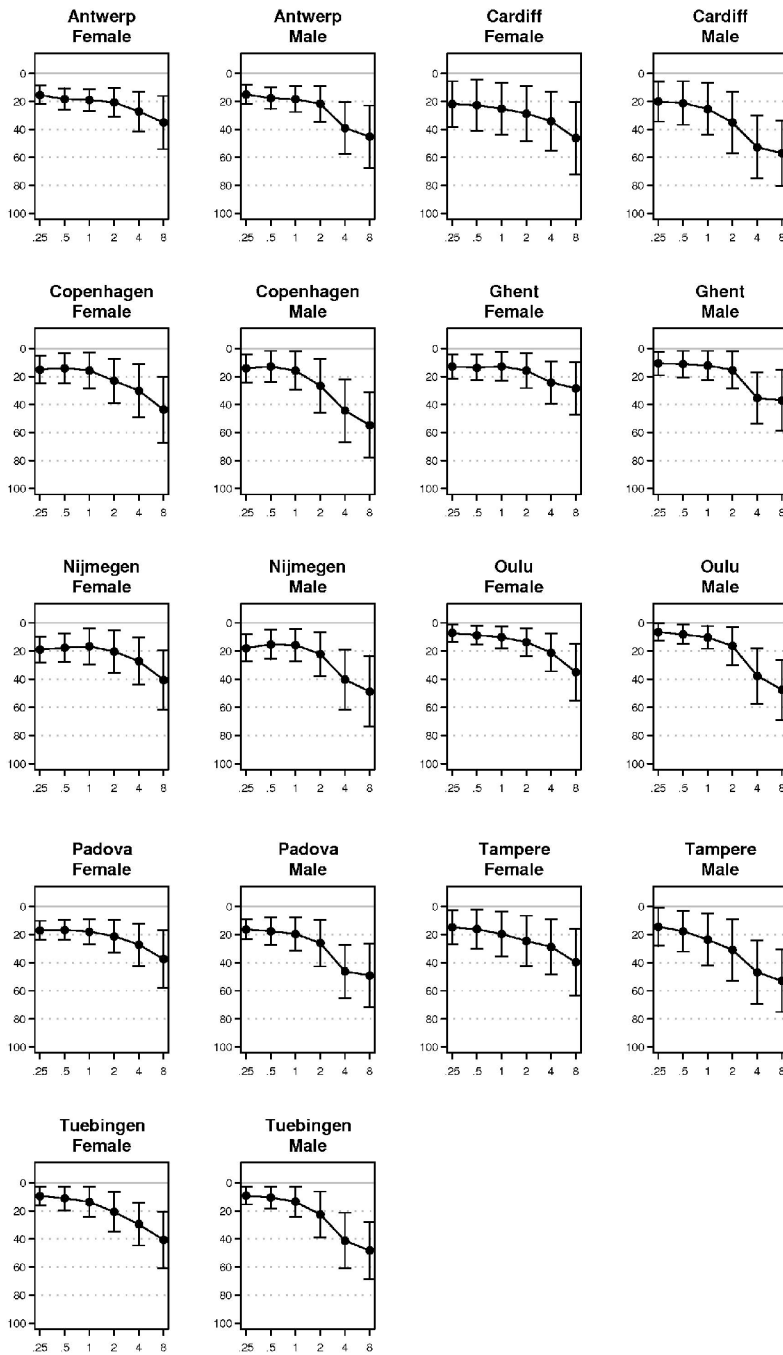

Supplementary Figure 1

Supplement: 10162_2008_123_MOESM6_ESM.pdf [file 10162_2008_123_MOESM6_ESM.pdf]

**hierarchical clustering p values**

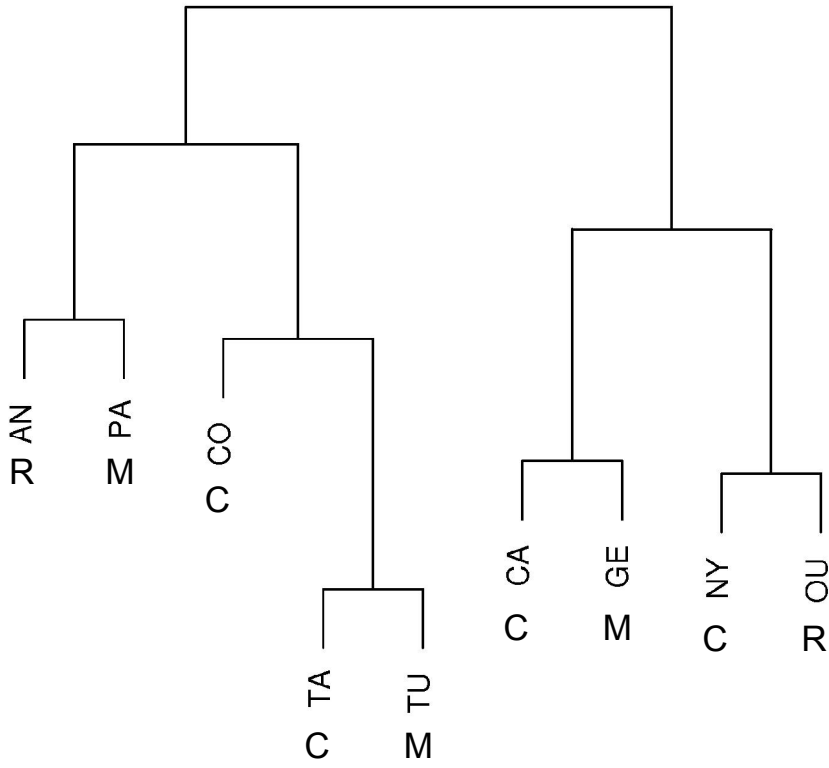

**Supplementary Figure 2**

Supplement: 10162_2008_123_MOESM7_ESM.pdf [file 10162_2008_123_MOESM7_ESM.pdf]
